# Supplementary material
Source: PubMed Central journal article supplement (PMC3966951)
Supplement: NIHMS535750-supplement-SupplementalTable1.pdf [file NIHMS535750-supplement-SupplementalTable1.pdf]

**Supplemental Table 1.** Examples of food items for each food group.

| <b>Food group</b>                          | <b>Examples of food items</b>                                                                                              |
|--------------------------------------------|----------------------------------------------------------------------------------------------------------------------------|
| Rice                                       | White and brown rice                                                                                                       |
| Wheat noodles                              | Wheat noodles                                                                                                              |
| Wheat flour                                | Wheat flour                                                                                                                |
| Wheat buns, breads                         | Bun, butter bread, salty bread                                                                                             |
| Cakes, cookies and pastries                | Cookies, mooncake, fruit cake, chocolate cake, fruit pie                                                                   |
| Deep-fried wheat                           | Deep-fried dough stick, deep-fried cake with red bean paste and sugar, deep-fried sweet sesame seed ball                   |
| Deep-fried rice and legumes                | Deep-fried rice flour doughnut, deep-fried soybean, deep-fried broad bean                                                  |
| Corn and coarse grain                      | Corn, corn grits, corn flour, barley, oats, foxtail millet, sorghum                                                        |
| Starchy roots and tubers                   | Potato, yam, taro, lotus root, water chestnut, cassava, sweet potato                                                       |
| Fresh legumes                              | Soybean sprouts, peas with pod, mung bean sprouts                                                                          |
| Dried legumes                              | Soybean flour, dried beans, beans flour, roasted broad bean                                                                |
| Legume products                            | Tofu, tofu products, red/mung bean paste                                                                                   |
| Nuts and seeds                             | Sesame, sunflower, watermelon seeds, lotus seeds, peanuts, walnuts, almonds, hazelnuts, pine-nuts, pistachios, cashew nuts |
| Starchy roots products and tubers products | Potato starch, lotus root starch, potato flour, corn starch, starch                                                        |
| Fresh vegetables, non-leafy                | Cauliflower, tomatoes, cucumber, zucchini, mushrooms                                                                       |
| Fresh vegetables, leafy                    | Spinach, 'bok choy', cabbage                                                                                               |
| Pickled, salted or canned vegetables       | Canned tomato sauce, preserved vegetables, vegetables in soy sauce                                                         |
| Dried vegetables                           | Dried radish, dried bamboo shoot, dried lily                                                                               |
| Seaweed                                    | Fresh or dried seaweed                                                                                                     |
| Fruits                                     | Fresh and canned (no added sugar) fruits                                                                                   |
| Dried fruit                                | Dates, dried longan, raisins                                                                                               |
| Preserved fruit with added sugar           | Dried and canned fruit with added sugar                                                                                    |
| Low-fat red meat                           | Low-fat beef, low-fat lamb, donkey, rabbit                                                                                 |
| High-fat red meat                          | High-fat beef, high-fat lamb                                                                                               |
| Low-fat pork                               | Pork tenderloin pork, pork tendons                                                                                         |
| High-fat pork                              | Pork belly, leg, rib chop                                                                                                  |
| Organ meats                                | Liver, kidney, large intestine, blood                                                                                      |
| Processed meats                            | Sausages, ham, luncheon meat, dried meat, smoked meat                                                                      |
| Poultry and game                           | Chicken, duck, goose                                                                                                       |
| Eggs and eggs products                     | Whole eggs, yolk, white, preserved eggs                                                                                    |
| Fish and seafood                           | Fresh- and salt-water fish, dried fish, shellfish                                                                          |
| Soy milk                                   | Sweetened and un-sweetened soy milk                                                                                        |
| Animal-based milk                          | Cow milk, goat milk, skim milk, flavored milk                                                                              |
| Dairy products                             | Cheese, yogurt                                                                                                             |
| Sweetened dairy products                   | Ice cream                                                                                                                  |
| Western-style fast-food                    | Fried chicken, sandwich, hamburger, hotdog, pizza                                                                          |
| Instant noodles and frozen dumplings       | Instant noodles, frozen dumplings                                                                                          |
| Ready-to-eat cereals/porridge              | Instant multigrain porridge, corn flakes, instant oatmeal                                                                  |
| Salty snacks                               | Corn crisps, onion rings, potato chips,                                                                                    |

|                                         |                                                    |
|-----------------------------------------|----------------------------------------------------|
| Candy, sugar and other high-sugar foods | Jelly, jam, chocolate, honey, sugar, candies       |
| Calorically-sweetened beverages         | Fruit or flavored drinks, fruit juice, soft drinks |
| Low-caloric beverages                   | Tea, bottled water                                 |
| Alcoholic beverages                     | Liquors, wine, vodka, cocktails, whiskey, beer     |
